# Supplementary material for: Identification of Potent Novel Biomarkers of Uterine Leiomyoma Through DEGs Screening and Networking.
Source: Research Square preprint supplement (doi:10.21203/rs.3.rs-484042/v1), 2021-05-12
Supplement: Supplementary file 1 [file f922ba1e6d215653eb696242.xlsx]

## Sheet: UP
ENSEMBL_GENE_ID	ID	adj.P.Val	P.Value	t	B	logFC	Description	SPOT_ID
ENSG00000003096	KLHL13	5.16e-06	2.17e-09	11.4474	11.6033	1.41224	kelch-like 13 (Drosophila)	ENSG00000003096
ENSG00000009694	TENM1	0.012	0.000389	4.40756	0.090124	1.12859	odz, odd Oz/ten-m homolog 1(Drosophila)	ENSG00000009694
ENSG00000010810	FYN	0.000319	1.29e-06	7.29202	5.63879	1.3319	FYN oncogene related to SRC, FGR, YES	ENSG00000010810
ENSG00000013016	EHD3	0.00164	1.86e-05	5.87697	3.0535	1.65562	EH-domain containing 3	ENSG00000013016
ENSG00000033122	LRRC7	3.34e-06	1.18e-09	11.9213	12.1509	3.41496	leucine rich repeat containing 7	ENSG00000033122
ENSG00000038427	VCAN	0.000232	6.97e-07	7.64238	6.23294	2.02793	versican	ENSG00000038427
ENSG00000050555	LAMC3	0.169	0.024	2.47898	-3.84899	0.543713	laminin, gamma 3	ENSG00000050555
ENSG00000060718	COL11A1	0.0114	0.00036	4.44319	0.164329	1.99115	collagen, type XI, alpha 1	ENSG00000060718
ENSG00000067445	TRO	0.00138	1.36e-05	6.03831	3.36299	1.43865	trophinin	ENSG00000067445
ENSG00000071539	TRIP13	0.0458	0.00307	3.45036	-1.91077	0.398639	thyroid hormone receptor interactor 13	ENSG00000071539
ENSG00000077152	UBE2T	0.109	0.0116	2.8301	-3.17178	1.40868	ubiquitin-conjugating enzyme E2T (putative)	ENSG00000077152
ENSG00000077279	DCX	7.4e-05	1.36e-07	8.61332	7.78551	6.20201	doublecortin	ENSG00000077279
ENSG00000087510	TFAP2C	0.000253	7.75e-07	7.58195	6.13176	2.31035	transcription factor AP-2 gamma (activating enhancer binding protein 2 gamma)	ENSG00000087510
ENSG00000089472	HEPH	0.000676	4.56e-06	6.60568	4.42174	1.20195	hephaestin	ENSG00000089472
ENSG00000092051	JPH4	0.000132	3.19e-07	8.0982	6.97876	1.51116	junctophilin 4	ENSG00000092051
ENSG00000102924	CBLN1	0.00892	0.00025	4.61503	0.52114	2.02796	cerebellin 1 precursor	ENSG00000102924
ENSG00000105290	APLP1	0.00729	0.000184	4.7594	0.819277	0.539479	amyloid beta (A4) precursor-like protein 1	ENSG00000105290
ENSG00000106484	MEST	2.8e-05	3.1e-08	9.56127	9.17437	3.01449	mesoderm specific transcript homolog (mouse)	ENSG00000106484
ENSG00000108825	PTGES3L-AARSD1	0.0504	0.00355	3.38364	-2.04898	0.544479	alanyl-tRNA synthetase domain containing 1	ENSG00000108825
ENSG00000108950	FAM20A	8.18e-06	5.6e-09	10.746	10.7486	3.14304	family with sequence similarity 20, member A	ENSG00000108950
ENSG00000109103	UNC119	0.0588	0.00441	3.28286	-2.25686	0.371364	unc-119 homolog (C. elegans)	ENSG00000109103
ENSG00000109670	FBXW7	0.0741	0.00625	3.12036	-2.58928	0.287435	F-box and WD repeat domain containing 7	ENSG00000109670
ENSG00000113578	FGF1	0.0852	0.00796	3.00743	-2.81787	0.728637	fibroblast growth factor 1 (acidic)	ENSG00000113578
ENSG00000115687	PASK	0.113	0.0124	2.79629	-3.23845	0.0410958	PAS domain containing serine/threonine kinase	ENSG00000115687
ENSG00000116745	RPE65	0.00809	0.000217	4.68177	0.659172	2.02159	retinal pigment epithelium-specific protein 65kDa	ENSG00000116745
ENSG00000119042	SATB2	0.000152	3.85e-07	7.98808	6.80137	3.97131	SATB homeobox 2	ENSG00000119042
ENSG00000119699	TGFB3	0.00057	3.68e-06	6.71973	4.62886	2.61503	transforming growth factor, beta 3	ENSG00000119699
ENSG00000121068	TBX2	0.00629	0.000146	4.86915	1.04475	1.37042	T-box 2	ENSG00000121068
ENSG00000121577	POPDC2	0.000429	2.06e-06	7.03587	5.19282	3.46361	popeye domain containing 2	ENSG00000121577
ENSG00000121690	DEPDC7	0.000481	2.56e-06	6.91653	4.98169	1.86586	DEP domain containing 7	ENSG00000121690
ENSG00000129116	PALLD	0.00434	8.28e-05	5.14113	1.59849	0.507637	palladin, cytoskeletal associated protein	ENSG00000129116
ENSG00000129128	SPCS3	0.00057	3.69e-06	6.71843	4.62652	1.20082	signal peptidase complex subunit 3 homolog (S. cerevisiae)	ENSG00000129128
ENSG00000130584	ZBTB46	0.0074	0.000188	4.74971	0.79932	0.756698	zinc finger and BTB domain containing 46	ENSG00000130584
ENSG00000134574	ddb2	0.0016	1.76e-05	5.90681	3.11102	1.35348	damage-specific DNA binding protein 2, 48kDa	ENSG00000134574
ENSG00000134901	KDELC1	0.00336	5.54e-05	5.33608	1.99049	1.90945	KDEL (Lys-Asp-Glu-Leu) containing 1	ENSG00000134901
ENSG00000135540	NHSL1	0.116	0.013	2.77616	-3.27802	0.395178	NHS-like 1	ENSG00000135540
ENSG00000135749	PCNX2	0.15	0.0199	2.57124	-3.67458	0.097227	pecanex-like 2 (Drosophila)	ENSG00000135749
ENSG00000135916	ITM2C	0.000589	3.85e-06	6.69661	4.58703	2.06573	integral membrane protein 2C	ENSG00000135916
ENSG00000136856	SLC2A8	0.0412	0.00261	3.52513	-1.75543	0.959265	solute carrier family 2 (facilitated glucose transporter), member 8	ENSG00000136856
ENSG00000136895	GARNL3	0.0752	0.00637	3.11142	-2.60746	0.428072	GTPase activating Rap/RanGAP domain-like 3	ENSG00000136895
ENSG00000137672	TRPC6	0.000491	2.71e-06	6.88413	4.92401	2.2298	transient receptor potential cation channel, subfamily C, member 6	ENSG00000137672
ENSG00000138311	ZNF365	0.0408	0.00258	3.53176	-1.74162	0.181376	zinc finger protein 365	ENSG00000138311
ENSG00000138798	EGF	0.243	0.0434	2.1828	-4.38786	0.366409	epidermal growth factor	ENSG00000138798
ENSG00000139219	COL2A1	0.22	0.0363	2.27337	-4.22677	0.810149	collagen, type II, alpha 1	ENSG00000139219
ENSG00000139330	KERA	0.000985	7.68e-06	6.33141	3.91578	2.74342	keratocan	ENSG00000139330
ENSG00000141582	CBX4	0.000262	8.97e-07	7.49816	5.99058	1.99079	chromobox homolog 4	ENSG00000141582
ENSG00000142207	URB1	0.00536	0.000113	4.99033	1.29238	0.747728	URB1 ribosome biogenesis 1 homolog (S. cerevisiae)	ENSG00000142207
ENSG00000144278	GALNT13	0.0703	0.00578	3.15696	-2.51475	1.41746	UDP-N-acetyl-alpha-D-galactosamine:polypeptide N-acetylgalactosaminyltransferase	ENSG00000144278
ENSG00000145506	NKD2	0.00199	2.62e-05	5.70505	2.71978	2.36462	naked cuticle homolog 2 (Drosophila)	ENSG00000145506
ENSG00000145681	HAPLN1	0.0586	0.00439	3.28491	-2.25264	1.89089	hyaluronan and proteoglycan link protein 1	ENSG00000145681
ENSG00000145685	LHFPL2	0.000126	2.86e-07	8.16441	7.08458	1.30641	lipoma HMGIC fusion partner-like 2	ENSG00000145685
ENSG00000147130	ZMYM3	0.119	0.0135	2.75775	-3.31412	0.123662	zinc finger, MYM-type 3	ENSG00000147130
ENSG00000147145	LPAR4	0.00713	0.000177	4.777	0.855504	1.33841	lysophosphatidic acid receptor 4	ENSG00000147145
ENSG00000148288	GBGT1	0.0141	0.000498	4.29239	-0.150175	0.36621	globoside alpha-1,3-N-acetylgalactosaminyltransferase 1	ENSG00000148288
ENSG00000148848	ADAM12	4.04e-05	5.96e-08	9.13526	8.56514	4.30428	ADAM metallopeptidase domain 12	ENSG00000148848
ENSG00000149256	TENM4	1.17e-05	9.84e-09	10.3451	10.2348	2.40737	odz, odd Oz/ten-m homolog 4 (Drosophila)	ENSG00000149256
ENSG00000151376	ME3	0.00303	4.83e-05	5.40381	2.12564	1.24617	malic enzyme 3, NADP(+)-dependent, mitochondrial	ENSG00000151376
ENSG00000151790	TDO2	0.000183	5.01e-07	7.83294	6.54844	5.43158	tryptophan 2,3-dioxygenase	ENSG00000151790
ENSG00000152128	TMEM163	0.000481	2.51e-06	6.92631	4.99908	3.1549	transmembrane protein 163	ENSG00000152128
ENSG00000153406	NMRAL1	0.069	0.00564	3.16881	-2.49058	0.459762	NmrA-like family domain containing 1	ENSG00000153406
ENSG00000154122	ANKH	0.0236	0.00116	3.90103	-0.969743	0.902066	ankylosis, progressive homolog (mouse)	ENSG00000154122
ENSG00000156103	MMP16	5.75e-06	2.73e-09	11.2763	11.3998	1.85523	matrix metallopeptidase 16 (membrane-inserted)	ENSG00000156103
ENSG00000156395	SORCS3	0.00571	0.000124	4.94745	1.20491	1.79101	sortilin-related VPS10 domain containing receptor 3	ENSG00000156395
ENSG00000158008	EXTL1	0.139	0.0174	2.63497	-3.55255	0.640136	exostoses (multiple)-like 1	ENSG00000158008
ENSG00000159915	ZNF233	0.237	0.0415	2.20631	-4.34638	0.17845	zinc finger protein 233	ENSG00000159915
ENSG00000164122	ASB5	5.55e-05	9.36e-08	8.84787	8.14048	5.73762	ankyrin repeat and SOCS box-containing 5	ENSG00000164122
ENSG00000165244	ZNF367	0.0329	0.00189	3.6739	-1.4452	0.999789	zinc finger protein 367	ENSG00000165244
ENSG00000166863	TAC3	0.0394	0.00244	3.5573	-1.68845	0.906102	tachykinin 3	ENSG00000166863
ENSG00000167702	KIFC2	0.234	0.0404	2.21923	-4.32348	0.354108	kinesin family member C2	ENSG00000167702
ENSG00000168280	KIF5C	4.94e-10	2.6e-14	23.3492	20.4452	3.50139	kinesin family member 5C	ENSG00000168280
ENSG00000168710	AHCYL1	0.000646	4.29e-06	6.63844	4.48144	0.514934	adenosylhomocysteinase-like 1	ENSG00000168710
ENSG00000169169	CPT1C	0.000285	1.06e-06	7.4056	5.83341	1.93636	carnitine palmitoyltransferase 1C	ENSG00000169169
ENSG00000169436	COL22A1	0.0262	0.00137	3.8226	-1.13407	0.129556	collagen, type XXII, alpha 1	ENSG00000169436
ENSG00000170037	CNTROB	0.0065	0.000153	4.84668	0.998667	1.09141	centrobin, centrosomal BRCA2 interacting protein	ENSG00000170037
ENSG00000171469	ZNF561	0.00427	7.98e-05	5.15893	1.63445	0.722328	zinc finger protein 561	ENSG00000171469
ENSG00000171492	LRRC8D	0.00178	2.21e-05	5.79147	2.88803	0.910856	leucine rich repeat containing 8 family, member D	ENSG00000171492
ENSG00000172731	LRRC20	0.0137	0.000472	4.31674	-0.099316	0.665555	leucine rich repeat containing 20	ENSG00000172731
ENSG00000174442	ZWILCH	0.0157	0.000582	4.2195	-0.302565	0.861399	Zwilch, kinetochore associated, homolog (Drosophila)	ENSG00000174442
ENSG00000175600	SUGCT	0.00622	0.000143	4.87783	1.06252	0.852585	chromosome 7 open reading frame 10	ENSG00000175600
ENSG00000176956	LY6H	0.0158	0.00059	4.21317	-0.315811	2.6124	lymphocyte antigen 6 complex, locus H	ENSG00000176956
ENSG00000178184	PARD6G	0.00231	3.33e-05	5.58654	2.48743	0.691986	par-6 partitioning defective 6 homolog gamma (C. elegans)	ENSG00000178184
ENSG00000180263	FGD6	0.0544	0.00394	3.33548	-2.14845	0.576468	FYVE, RhoGEF and PH domain containing 6	ENSG00000180263
ENSG00000182185	RAD51B	3.34e-06	1.02e-09	12.0322	12.2757	2.43299	RAD51-like 1 (S. cerevisiae)	ENSG00000182185
ENSG00000182667	NTM	0.000165	4.43e-07	7.90529	6.66682	2.87171	neurotrimin	ENSG00000182667
ENSG00000182963	GJC1	0.000215	6.22e-07	7.70769	6.34166	1.82538	gap junction protein, gamma 1, 45kDa	ENSG00000182963
ENSG00000184304	PRKD1	0.000535	3.23e-06	6.79089	4.75711	1.31036	protein kinase D1	ENSG00000184304
ENSG00000184939	ZFP90	0.00277	4.29e-05	5.46155	2.2404	0.431126	zinc finger protein 90 homolog (mouse)	ENSG00000184939
ENSG00000185219	ZNF445	0.00384	6.86e-05	5.23222	1.78218	0.42521	zinc finger protein 445	ENSG00000185219
ENSG00000187398	LUZP2	0.0782	0.00687	3.07659	-2.67815	0.523204	leucine zipper protein 2	ENSG00000187398
ENSG00000187720	THSD4	5.05e-08	5.32e-12	16.8303	16.6667	2.63808	thrombospondin, type I, domain containing 4	ENSG00000187720
ENSG00000196338	NLGN3	0.231	0.0394	2.23272	-4.2995	0.0358492	neuroligin 3	ENSG00000196338
ENSG00000196368	NUDT11	5.93e-05	1.03e-07	8.78718	8.04936	1.46716	nudix (nucleoside diphosphate linked moiety X)-type motif 11	ENSG00000196368
ENSG00000197852	LOC101928718	0.0216	0.000989	3.97405	-0.816691	0.625313	chromosome 1 open reading frame 183	ENSG00000197852
ENSG00000198759	EGFL6	0.00102	8.41e-06	6.28426	3.8277	3.93153	EGF-like-domain, multiple 6	ENSG00000198759
ENSG00000198876	DCAF12	2.8e-05	2.84e-08	9.62064	9.2574	0.648861	DDB1 and CUL4 associated factor 12	ENSG00000198876
ENSG00000203805	PLPP4	0.0359	0.00214	3.6168	-1.56442	1.59738	phosphatidic acid phosphatase type 2 domain containing 1A	ENSG00000203805
ENSG00000213694	S1PR3	0.000481	2.53e-06	6.9222	4.99178	2.07473	sphingosine-1-phosphate receptor 3	ENSG00000213694
ENSG00000219665	LOC101928464	0.0344	0.00202	3.64324	-1.50923	0.153217	NA	ENSG00000219665
ENSG00000240990	HOXA11-AS	0.00535	0.000113	4.99284	1.2975	0.725338	HOXA11 antisense RNA (non-protein coding)	ENSG00000240990
ENSG00000246985	SOCS2-AS1	0.00148	1.55e-05	5.96994	3.23229	1.85791	NA	ENSG00000246985
ENSG00000250107	CACNA1G-AS1	0.242	0.0429	2.18877	-4.37734	0.105139	NA	ENSG00000250107

## Sheet: Down
ENSEMBL_GENE_ID	ID	adj.P.Val	P.Value	t	B	logFC	Description	SPOT_ID
ENSG00000001561	ENPP4	3.07e-05	3.72e-08	-9.44184	9.00597	-2.23268	ectonucleotide pyrophosphatase/phosphodiesterase 4 (putative)	ENSG00000001561
ENSG00000003402	CFLAR	0.00154	1.66e-05	-5.93424	3.16377	-1.0331	CASP8 and FADD-like apoptosis regulator	ENSG00000003402
ENSG00000003436	TFPI	3.34e-06	1.23e-09	-11.8846	12.1093	-2.51915	tissue factor pathway inhibitor (lipoprotein-associated coagulation inhibitor)	ENSG00000003436
ENSG00000005059	MCUB	0.000905	6.91e-06	-6.38669	4.01866	-1.4747	coiled-coil domain containing 109B	ENSG00000005059
ENSG00000008282	SYPL1	0.000519	2.95e-06	-6.83872	4.84288	-0.779693	synaptophysin-like 1	ENSG00000008282
ENSG00000072210	ALDH3A2	7.93e-06	4.18e-09	-10.9603	11.0155	-0.972612	aldehyde dehydrogenase 3 family, member A2	ENSG00000072210
ENSG00000077147	TM9SF3	0.0362	0.00217	-3.61197	-1.57448	-0.30742	transmembrane 9 superfamily member 3	ENSG00000077147
ENSG00000087842	PIR	0.00214	2.93e-05	-5.65027	2.6126	-1.23187	pirin (iron-binding nuclear protein)	ENSG00000087842
ENSG00000099204	ABLIM1	0.000478	2.34e-06	-6.96431	5.06649	-1.73693	actin binding LIM protein 1	ENSG00000099204
ENSG00000100342	APOL1	0.0015	1.6e-05	-5.95427	3.20223	-0.913205	apolipoprotein L, 1	ENSG00000100342
ENSG00000101333	PLCB4	0.000145	3.58e-07	-8.03009	6.86924	-2.1918	phospholipase C, beta 4	ENSG00000101333
ENSG00000101384	JAG1	0.000435	2.11e-06	-7.02167	5.16781	-0.845449	jagged 1	ENSG00000101384
ENSG00000101695	RNF125	0.000332	1.37e-06	-7.25831	5.58067	-1.51562	ring finger protein 125	ENSG00000101695
ENSG00000104219	ZDHHC2	3.07e-05	3.67e-08	-9.44949	9.01682	-1.76765	zinc finger, DHHC-type containing 2	ENSG00000104219
ENSG00000104412	EMC2	0.0018	2.23e-05	-5.7856	2.87664	-0.526946	tetratricopeptide repeat domain 35	ENSG00000104412
ENSG00000107281	NPDC1	0.0102	0.000306	-4.51994	0.323947	-1.07996	neural proliferation, differentiation and control, 1	ENSG00000107281
ENSG00000107566	ERLIN1	0.00356	6.19e-05	-5.2824	1.883	-0.467829	ER lipid raft associated 1	ENSG00000107566
ENSG00000111058	ACSS3	0.00523	0.000109	-5.00975	1.33195	-2.21349	acyl-CoA synthetase short-chain family member 3	ENSG00000111058
ENSG00000111897	SERINC1	0.000279	1e-06	-7.43591	5.88501	-0.765085	serine incorporator 1	ENSG00000111897
ENSG00000112297	AIM1	8.18e-06	5.49e-09	-10.7604	10.7666	-2.74522	absent in melanoma 1	ENSG00000112297
ENSG00000113580	NR3C1	0.000317	1.27e-06	-7.3024	5.65667	-1.05174	nuclear receptor subfamily 3, group C, member 1 (glucocorticoid receptor)	ENSG00000113580
ENSG00000113594	LIFR	0.000165	4.35e-07	-7.91526	6.68308	-2.18083	leukemia inhibitory factor receptor alpha	ENSG00000113594
ENSG00000114166	KAT2B	3.91e-05	5.56e-08	-9.17965	8.62974	-1.41341	K(lysine) acetyltransferase 2B	ENSG00000114166
ENSG00000114331	ACAP2	0.0158	0.000594	-4.21002	-0.322391	-0.2816	ArfGAP with coiled-coil, ankyrin repeat and PH domains 2	ENSG00000114331
ENSG00000116132	PRRX1	0.0183	0.000762	-4.09443	-0.564421	-0.4958	paired related homeobox 1	ENSG00000116132
ENSG00000116711	PLA2G4A	0.00114	1.05e-05	-6.17041	3.61366	-1.99383	phospholipase A2, group IVA (cytosolic, calcium-dependent)	ENSG00000116711
ENSG00000117791	2020-03-02	0.000332	1.38e-06	-7.25448	5.57405	-1.34061	MOCO sulphurase C-terminal domain containing 2	ENSG00000117791
ENSG00000120063	GNA13	0.000118	2.55e-07	-8.23278	7.19318	-0.494202	guanine nucleotide binding protein (G protein), alpha 13	ENSG00000120063
ENSG00000120279	MYCT1	0.000279	1.01e-06	-7.42979	5.87461	-0.93599	myc target 1	ENSG00000120279
ENSG00000120526	NUDCD1	0.0138	0.000476	-4.31303	-0.107078	-0.799655	NudC domain containing 1	ENSG00000120526
ENSG00000123609	NMI	0.000831	6.18e-06	-6.44559	4.12778	-0.998981	N-myc (and STAT) interactor	ENSG00000123609
ENSG00000124785	NRN1	8.86e-06	6.54e-09	-10.6353	10.6086	-2.43034	neuritin 1	ENSG00000124785
ENSG00000126821	sgpp1	0.00139	1.42e-05	-6.01641	3.3212	-0.621691	sphingosine-1-phosphate phosphatase 1	ENSG00000126821
ENSG00000127870	RNF6	0.0105	0.000319	-4.50014	0.282806	-0.487474	ring finger protein (C3H2C3 type) 6	ENSG00000127870
ENSG00000128284	apol3	0.000271	9.56e-07	-7.4625	5.93018	-1.71016	apolipoprotein L, 3	ENSG00000128284
ENSG00000131831	RAI2	0.00112	9.76e-06	-6.20705	3.68275	-1.37118	retinoic acid induced 2	ENSG00000131831
ENSG00000131981	LGALS3	4.73e-05	7.6e-08	-8.97943	8.33627	-1.55987	lectin, galactoside-binding, soluble, 3	ENSG00000131981
ENSG00000133687	TMTC1	3.91e-05	5.55e-08	-9.18133	8.63218	-1.9632	transmembrane and tetratricopeptide repeat containing 1	ENSG00000133687
ENSG00000134352	il6st	0.001	7.95e-06	-6.31357	3.88251	-1.03526	interleukin 6 signal transducer (gp130, oncostatin M receptor)	ENSG00000134352
ENSG00000135272	MDFIC	2.35e-05	2.23e-08	-9.78196	9.48072	-1.03108	MyoD family inhibitor domain containing	ENSG00000135272
ENSG00000136826	KLF4	0.000387	1.72e-06	-7.13377	5.36444	-2.54935	Kruppel-like factor 4 (gut)	ENSG00000136826
ENSG00000137145	DENND4C	0.0212	0.000961	-3.98732	-0.788869	-0.331338	DENN/MADD domain containing 4C	ENSG00000137145
ENSG00000143162	CREG1	3.15e-05	3.98e-08	-9.39706	8.94236	-1.2569	cellular repressor of E1A-stimulated genes 1	ENSG00000143162
ENSG00000147642	SYBU	0.00026	8.68e-07	-7.51734	6.02298	-2.83311	syntabulin (syntaxin-interacting)	ENSG00000147642
ENSG00000147872	PLIN2	0.0942	0.00933	-2.93277	-2.96767	-1.69456	perilipin 2	ENSG00000147872
ENSG00000150625	GPM6A	1.66e-06	3.51e-10	-12.9001	13.2109	-3.14143	glycoprotein M6A	ENSG00000150625
ENSG00000151065	DCP1B	9.62e-05	1.87e-07	-8.41853	7.48487	-1.85574	DCP1 decapping enzyme homolog B (S. cerevisiae)	ENSG00000151065
ENSG00000151623	NR3C2	0.00518	0.000107	-5.01961	1.35201	-1.53637	nuclear receptor subfamily 3, group C, member 2	ENSG00000151623
ENSG00000151690	MFSD6	0.00027	9.39e-07	-7.47228	5.94676	-1.13979	major facilitator superfamily domain containing 6	ENSG00000151690
ENSG00000154556	SORBS2	0.00677	0.000163	-4.81713	0.938007	-1.65441	sorbin and SH3 domain containing 2	ENSG00000154556
ENSG00000155324	GRAMD3	0.00156	1.7e-05	-5.92461	3.14527	-1.71467	GRAM domain containing 3	ENSG00000155324
ENSG00000155957	TMBIM4	0.00326	5.28e-05	-5.35989	2.03807	-0.6519	transmembrane BAX inhibitor motif containing 4	ENSG00000155957
ENSG00000158481	CD1C	0.00119	1.09e-05	-6.14865	3.57254	-0.729207	CD1c molecule	ENSG00000158481
ENSG00000159658	EFCAB14	0.00283	4.43e-05	-5.44571	2.20897	-0.263581	KIAA0494	ENSG00000159658
ENSG00000162409	PRKAA2	0.000317	1.27e-06	-7.30405	5.65951	-1.10635	protein kinase, AMP-activated, alpha 2 catalytic subunit	ENSG00000162409
ENSG00000162496	DHRS3	0.000481	2.48e-06	-6.93233	5.00978	-1.76228	dehydrogenase/reductase (SDR family) member 3	ENSG00000162496
ENSG00000163629	PTPN13	0.00753	0.000194	-4.73336	0.765613	-0.831246	protein tyrosine phosphatase, non-receptor type 13 (APO-1/CD95 (Fas)-associated	ENSG00000163629
ENSG00000163751	CPA3	0.0113	0.000357	-4.44771	0.173738	-3.98922	carboxypeptidase A3 (mast cell)	ENSG00000163751
ENSG00000164342	TLR3	3.25e-05	4.28e-08	-9.34932	8.87425	-2.22958	toll-like receptor 3	ENSG00000164342
ENSG00000165092	ALDH1A1	2.28e-05	2.05e-08	-9.84029	9.56066	-4.38745	aldehyde dehydrogenase 1 family, member A1	ENSG00000165092
ENSG00000168679	SLC16A4	0.00139	1.4e-05	-6.02084	3.32966	-1.43624	solute carrier family 16, member 4 (monocarboxylic acid transporter 5)	ENSG00000168679
ENSG00000169218	RSPO1	0.0034	5.77e-05	-5.31668	1.95168	-1.98863	R-spondin homolog (Xenopus laevis)	ENSG00000169218
ENSG00000176046	NUPR1	0.0139	0.000486	-4.30372	-0.126508	-0.569592	nuclear protein, transcriptional regulator, 1	ENSG00000176046
ENSG00000176485	PLA2G16	7.67e-07	1.21e-10	-13.8129	14.1203	-2.17285	phospholipase A2, group XVI	ENSG00000176485
ENSG00000179144	GIMAP7	1.08e-05	8.5e-09	-10.4483	10.3689	-1.97131	GTPase, IMAP family member 7	ENSG00000179144
ENSG00000179348	GATA2	0.000596	3.93e-06	-6.68547	4.56686	-1.91121	GATA binding protein 2	ENSG00000179348
ENSG00000179639	FCER1A	0.00112	9.97e-06	-6.19635	3.6626	-2.5317	Fc fragment of IgE, high affinity I, receptor for; alpha polypeptide	ENSG00000179639
ENSG00000180628	PCGF5	0.00138	1.37e-05	-6.03164	3.35026	-0.836463	polycomb group ring finger 5	ENSG00000180628
ENSG00000182326	C1S	4.73e-05	7.73e-08	-8.96911	8.32099	-2.23708	complement component 1, s subcomponent	ENSG00000182326
ENSG00000183807	FAM162B	0.000405	1.9e-06	-7.07904	5.26867	-2.05572	family with sequence similarity 162, member B	ENSG00000183807
ENSG00000188906	LRRK2	0.00356	6.16e-05	-5.28495	1.88809	-1.42398	leucine-rich repeat kinase 2	ENSG00000188906
ENSG00000196116	TDRD7	0.00162	1.8e-05	-5.8957	3.08961	-0.861989	tudor domain containing 7	ENSG00000196116
ENSG00000196616	ADH1B	0.00169	2e-05	-5.84024	2.98254	-4.20237	alcohol dehydrogenase 1B (class I), beta polypeptide	ENSG00000196616
ENSG00000197343	ZNF655	0.177	0.0257	-2.4461	-3.91044	-0.410143	zinc finger protein 655	ENSG00000197343
ENSG00000221963	APOL6	0.0013	1.25e-05	-6.07912	3.44071	-1.17209	apolipoprotein L, 6	ENSG00000221963
